# Supplementary material for: Nanopillar-forest based surface-enhanced Raman scattering substrates
Source: Springer Nature journal article supplement (doi:10.1007/s11432-014-5114-8), 2014-05-06
Supplement: 11432_2014_5114_MOESM1_ESM.pdf [file 11432_2014_5114_MOESM1_ESM.pdf]

中文题目: 基于纳米柱森林结构的表面增强拉曼散射基底

关键词: 表面增强拉曼散射 (SERS), 纳米柱森林结构, 侧墙工艺, 多晶硅薄膜, 电磁场分布

创新点: 本论文利用多晶硅薄膜表面粗糙的特点, 结合侧墙工艺, 提出了纳米柱森林结构的新型制备方法. 这种方法不受传统光学光刻技术的线宽限制, 与微电子工艺具有良好的兼容性, 是可大批量、低成本、高精度、高密度制备纳米结构的加工手段. 在此基础上, 本论文将所制备的纳米柱森林结构用作表面增强拉曼散射的活性基底, 获得了良好的性能.
